# Supplementary material for: circZNF827 nucleates a transcription inhibitory complex to balance neuronal differentiation
Source: eLife journal article supplement (doi:10.7554/elife.58478), 2020-11-11
Supplement: figures [file elife-58478-figures-v1.pdf]

---

## Figures and figure supplements

*circZNF827* nucleates a transcription inhibitory complex to balance neuronal differentiation

**Anne Kruse Hollensen et al**

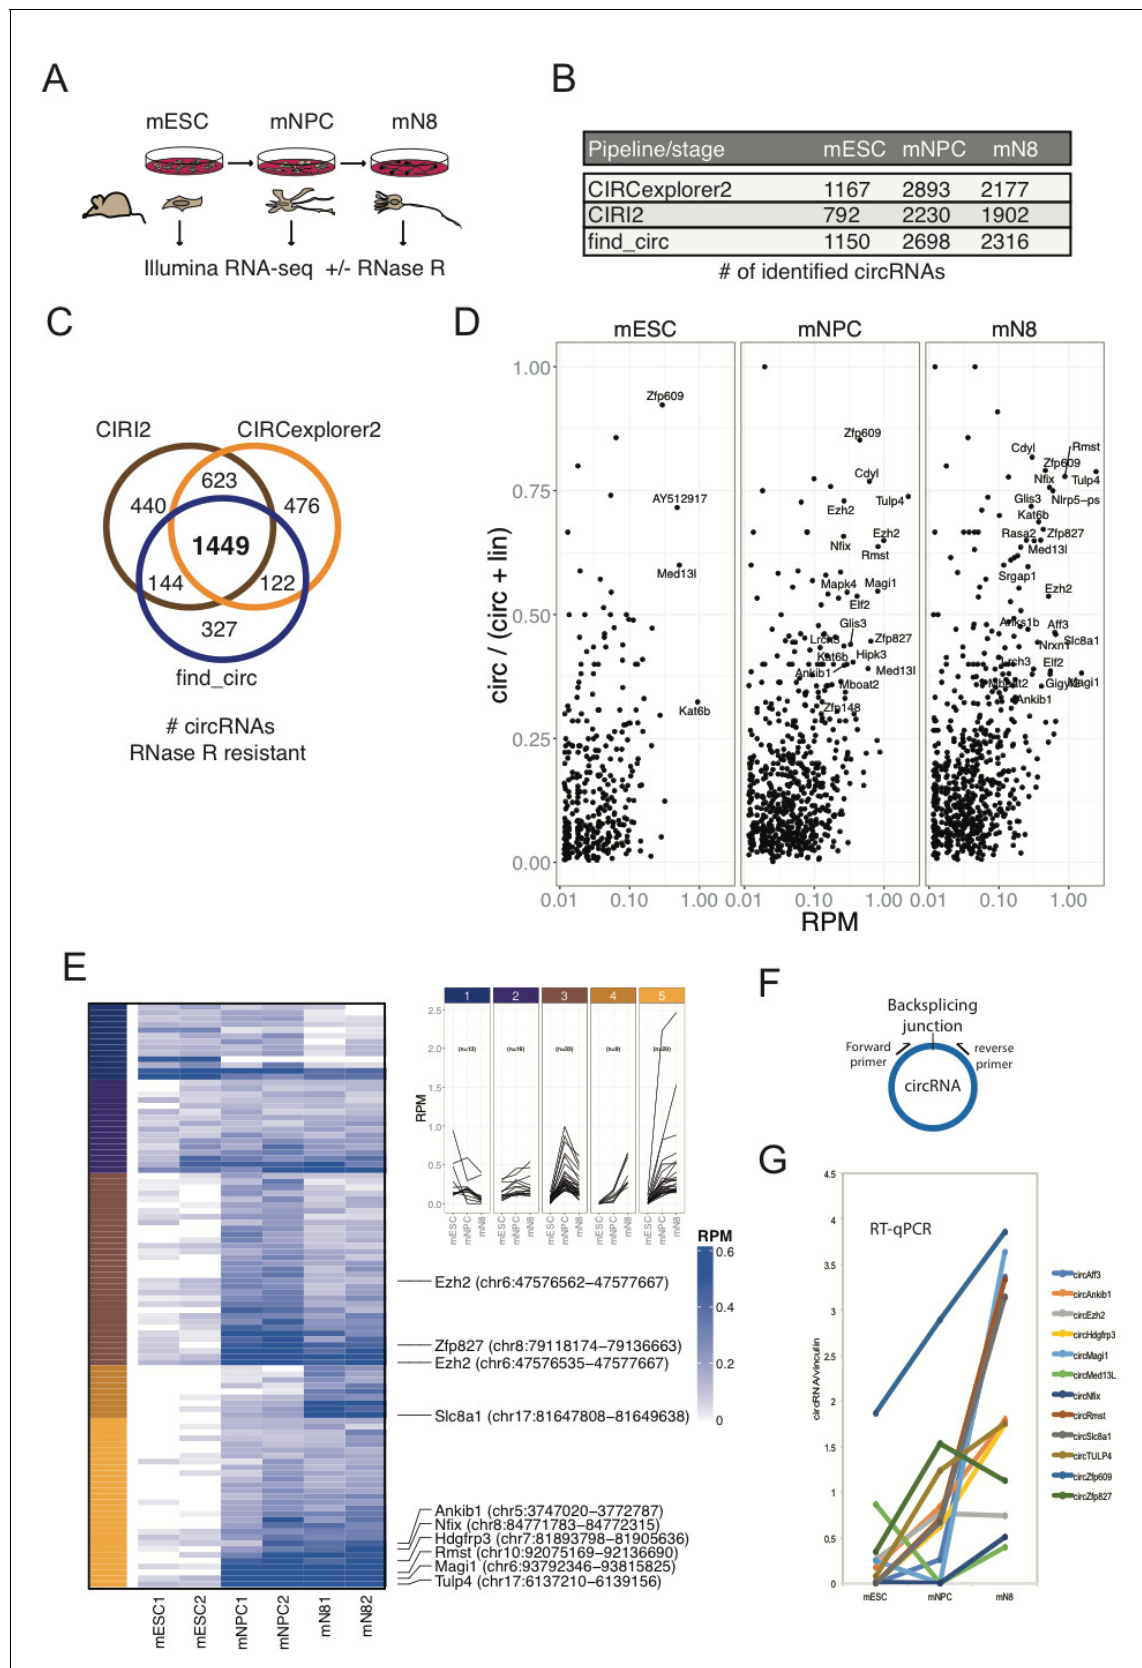

**Figure 1.** Determining the circRNA inventories of mESC, NPC and differentiated glutamatergic neurons and their differential regulation. (A) Schematic illustration of workflow for differentiation and RNA-seq. (B) Number of circRNAs detected by indicated circRNA prediction algorithm in different stages. Figure 1 continued on next page

*Figure 1 continued*

(C) Venn-diagram showing 1449 common circRNAs of a total of 3581 circRNAs predicted by the different algorithms (as indicated next to the diagram) that are either constant or enriched upon RNase R treatment. (D) circRNA/circRNA+linear precursor ratios as a function of expression level (RPM) at the three sequenced stages. (E) Left: Heatmap showing differential expression of top-100 expressed circRNAs (RPM scale to the right), with selected examples of circRNAs as indicated along with genomic coordinates (mm10). Top: K-means analysis displaying five different expression profiles during differentiation (same color code given to the left of the heatmap). (F) circRNA RT-qPCR strategy spanning the backsplicing junction. (G) RT-qPCR validation of selected circRNAs. Data are depicted as mean  $\pm$  SD (two biological replicates).

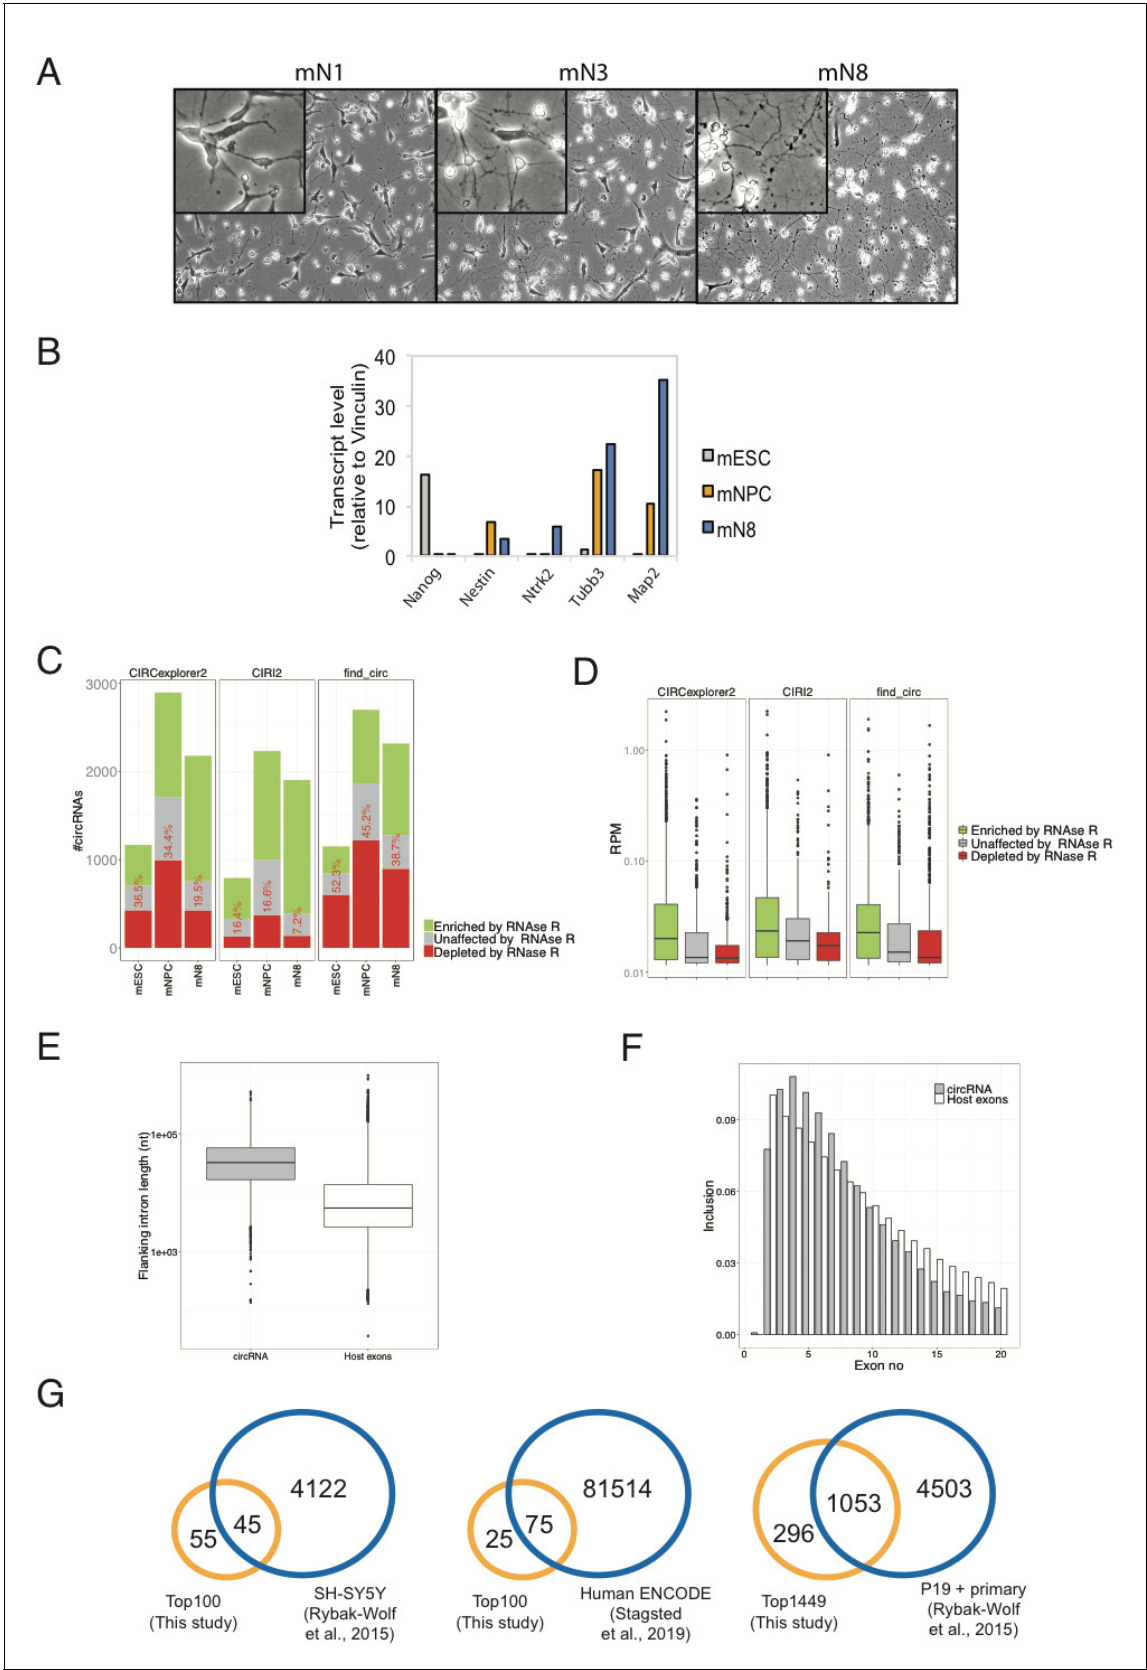

**Figure 1—figure supplement 1.** Mouse neuronal cell morphology, expression pattern of select markers and characteristics of circRNA inventory. (A) Brightfield image of mESCs subjected to neuronal differentiation (neuron days 1, 3, and 8). (B) RT-qPCR on pluripotency and neuronal markers (*Nanog*, *Nestin*, *Ntrk2*, *Tubb3*, *Map2*). (C) CircRNA identification using CIRCexplorer2, CIRI2, and find\_circ. (D) CircRNA expression levels (RPM) identified by CIRCexplorer2, CIRI2, and find\_circ. (E) Flanking intron length (nt) of circRNA and host exons. (F) Inclusion of circRNA and host exons across different exon numbers. (G) Overlap of circRNAs between different datasets. *Figure 1—figure supplement 1 continued on next page*

## Figure 1—figure supplement 1 continued

*Nestin*, *Ntrk2*, *Tubb3*, and *Map2*) at different stages in differentiation. (C) Quantification of RNase R resistant circRNAs. Fraction of either depleted, unaffected or enriched of total number of circRNAs upon RNase R treatment as a result of using indicated circRNA prediction algorithm. The red numbers in each column indicate the percentage of depleted ones. (D) Expression levels of depleted, unaffected or enriched circRNAs (RPM). (E) Distribution of length (nucleotides) of circRNA-flanking introns and introns found in host pre-mRNAs. (F) Frequency of inclusion of 5' proximal exons in circRNAs. (G) Venn-diagram comparing previously identified mouse and human homologue circRNAs, isolated from mouse brain regions or cell lines of either murine or human origin, with circRNAs identified in the present study. Data are depicted as mean  $\pm$  SD (two biological replicates).

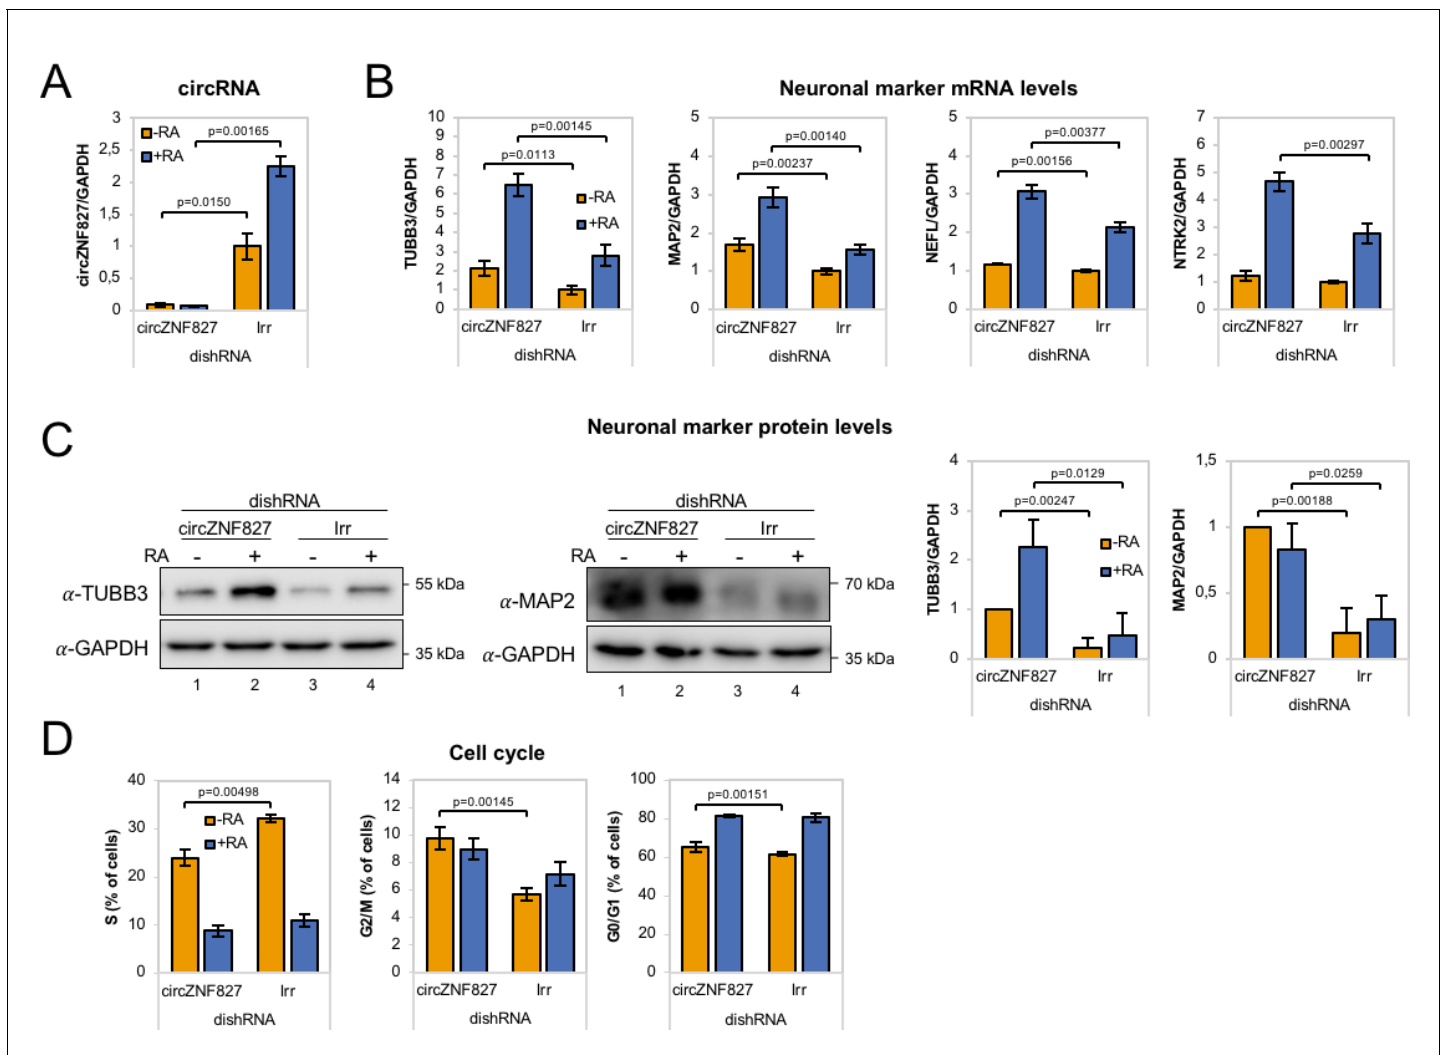

**Figure 2.** *circZNF827* regulates neuronal marker expression levels. (A) RT-qPCR analysis evaluating knockdown of *circZNF827* with dicer-independent short hairpin RNAs (dishRNAs) in the neuroblastoma cell line L-AN-5. (B) Relative mRNA levels of the neuronal markers *TUBB3*, *MAP2*, *NEFL*, and *NTRK2* evaluated by RT-qPCR upon knockdown of *circZNF827*. The mRNA expression levels were evaluated by RT-qPCR after 4 days of RA-mediated neuronal differentiation. (C) Western blotting (left panels) of *TUBB3* and *MAP2* upon *circZNF827* knockdown. *GAPDH* was used as loading control. The results of quantification of band intensities from western blots are shown the right panels. One representative western blot and the quantification of three is shown. (D) Cell cycle assay based on flow cytometric measurements of EdU incorporation into newly synthesized DNA in L-AN-5 cells upon *circZNF827* knockdown. +RA: differentiated L-AN-5 cells. -RA: undifferentiated L-AN-5 cells. lrr: Irrelevant dishRNA. In all panels, data are depicted as mean  $\pm$  SD (three biological replicates). p-Values were determined by a two-tailed Student's t test.

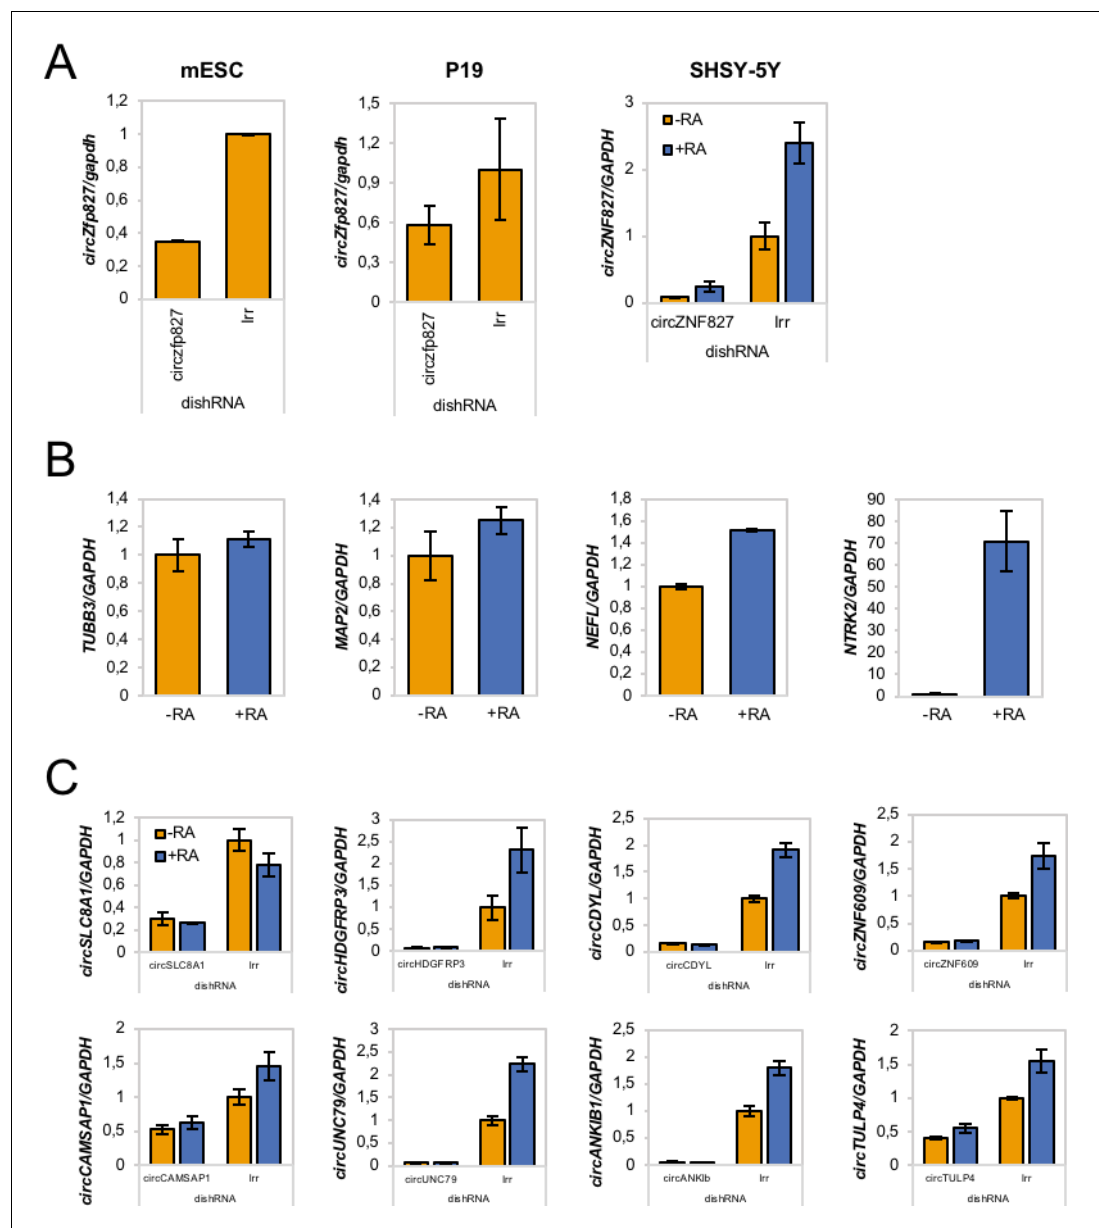

**Figure 2—figure supplement 1.** Evaluation of circZfp827/circZNF827 knockdown in different cell types and its impact on select neuronal marker expression. (A) Evaluation of dishRNA-mediated knockdown efficiencies of circZfp827/circZNF827 in mESCs, P19 cells and SHSY-5Y cells by RT-qPCR. (B) Evaluation of mRNA expression levels of the neuronal markers *TUBB3*, *MAP2*, *NEFL*, and *NTRK2* upon RA-mediated neuronal differentiation of SHSY-5Y cells by RT-qPCR. (C) Knockdown efficiencies of the circRNAs *circSLC8A1*, *circHDGFRP3*, *circCDYL*, *circZNF609*, *circCAMSAP1*, *circUNC79*, *circANKIB1*, and *circTULP4* in L-AN-5 cells measured by RT-qPCR using circRNA-specific primers. +RA: differentiated L-AN-5 cells. -RA: undifferentiated L-AN-5 cells. Irr: Irrelevant dishRNA. Data are depicted as mean  $\pm$  SD (three biological replicates).

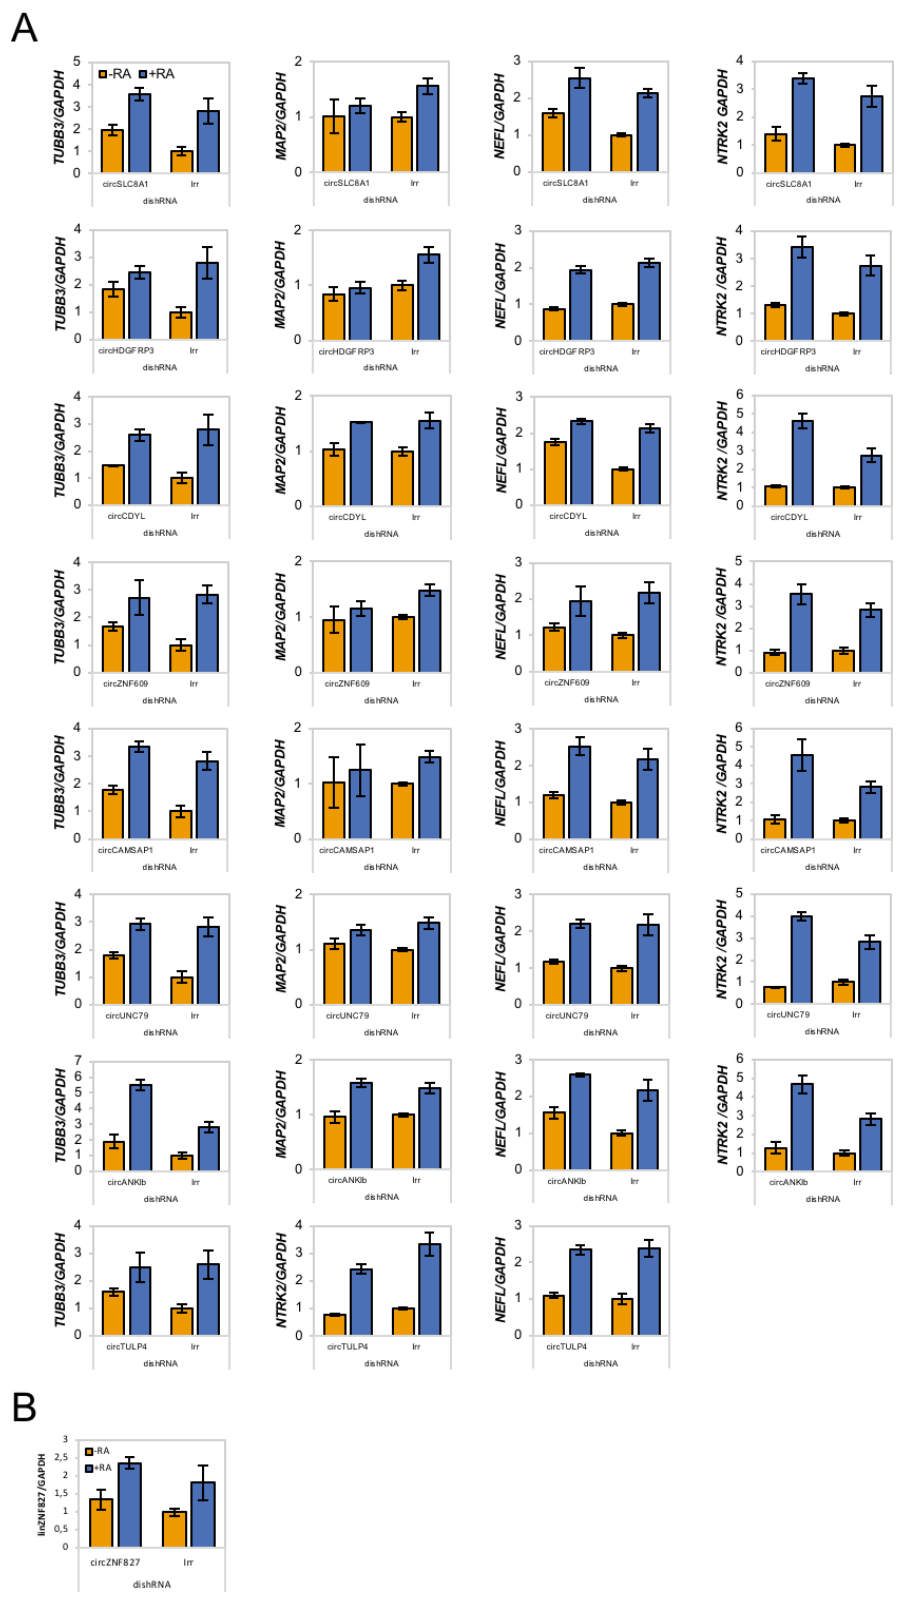

**Figure 2—figure supplement 2.** mRNA levels of neuronal markers upon circRNA knockdown. (A) mRNA expression levels of the neuronal markers *TUBB3*, *MAP2*, *NTRK2*, and *NEFL* upon circRNA knockdown in L-AN-5 cells evaluated by RT-qPCR. (B) Validation of linear ZNF827 (*linZNF827*) mRNA

Figure 2—figure supplement 2 continued on next page



Figure 2—figure supplement 2 continued

levels upon knockdown of *circZNF827* in L-AN-5 cells. +RA: differentiated L-AN-5 cells. -RA: undifferentiated L-AN-5 cells. Irr: Irrelevant dishRNA. Data are depicted as mean  $\pm$  SD (three biological replicates).

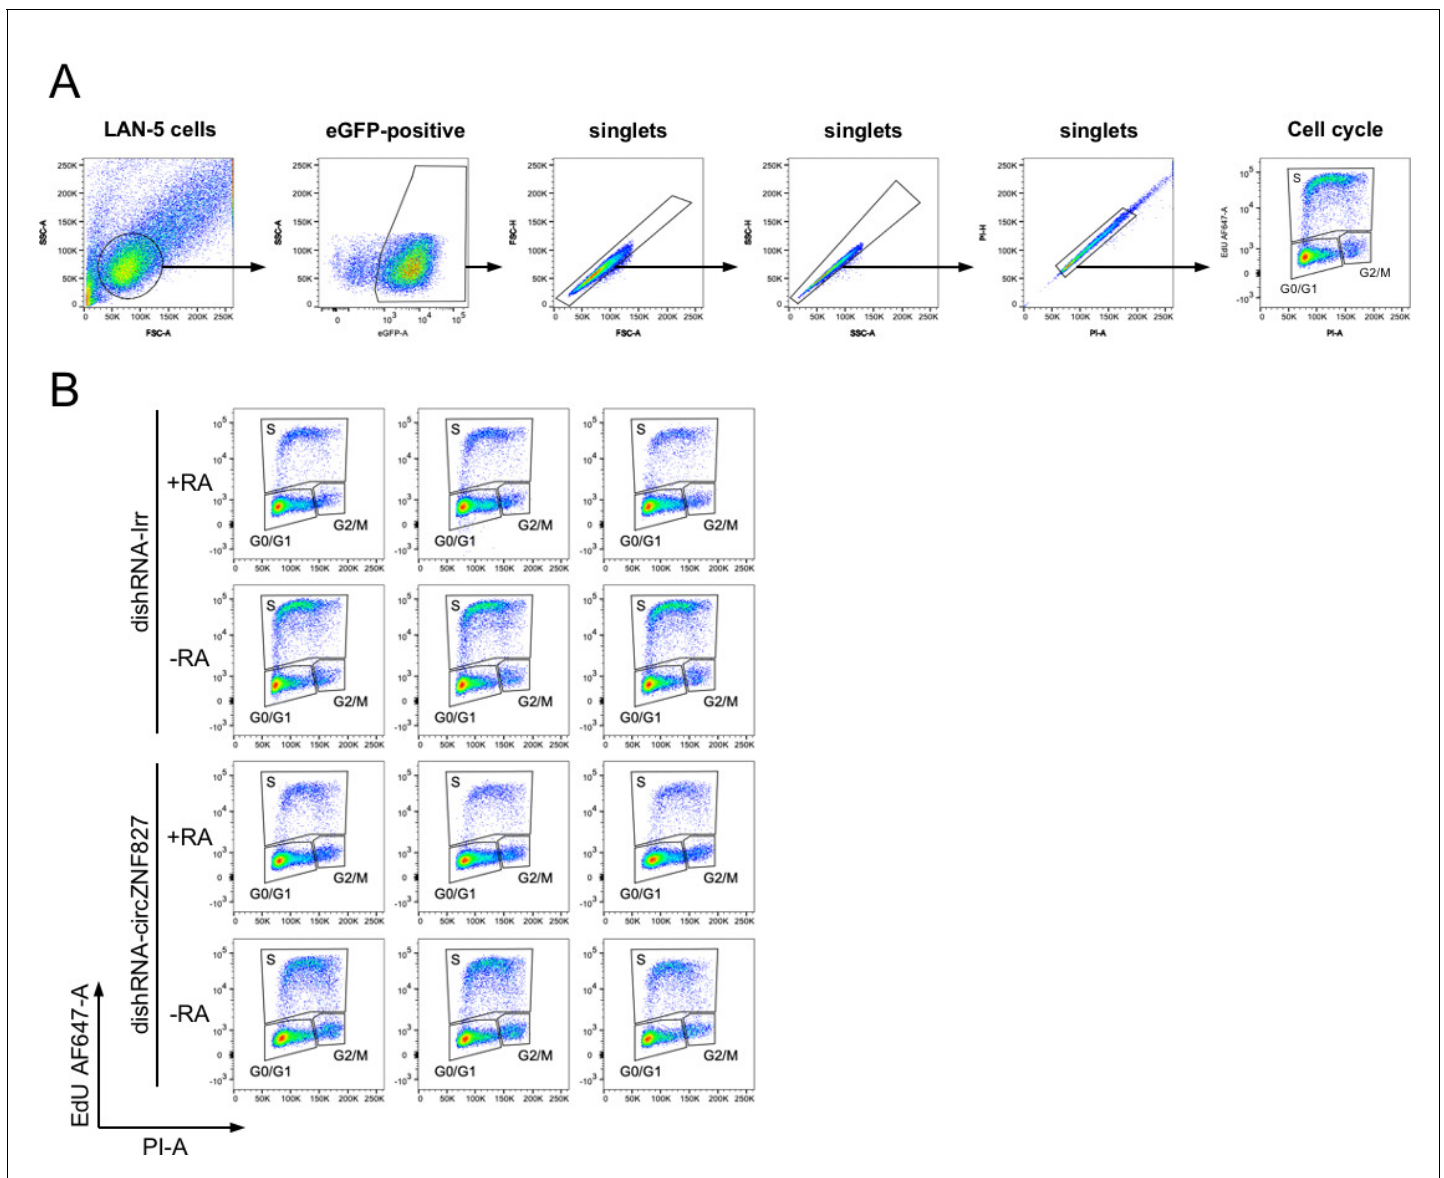

**Figure 2—figure supplement 3.** Flow cytometric gating strategy and raw data from cell cycle assay. (A) Gating strategy for the cell cycle assay shown in **Figure 2D**. (B) Flow cytometric analysis of the cell cycle assay also shown in **Figure 2D**. For all conditions three biological replicates are shown. +RA: differentiated L-AN-5 cells. -RA: undifferentiated L-AN-5 cells. Irr: Irrelevant dishRNA.

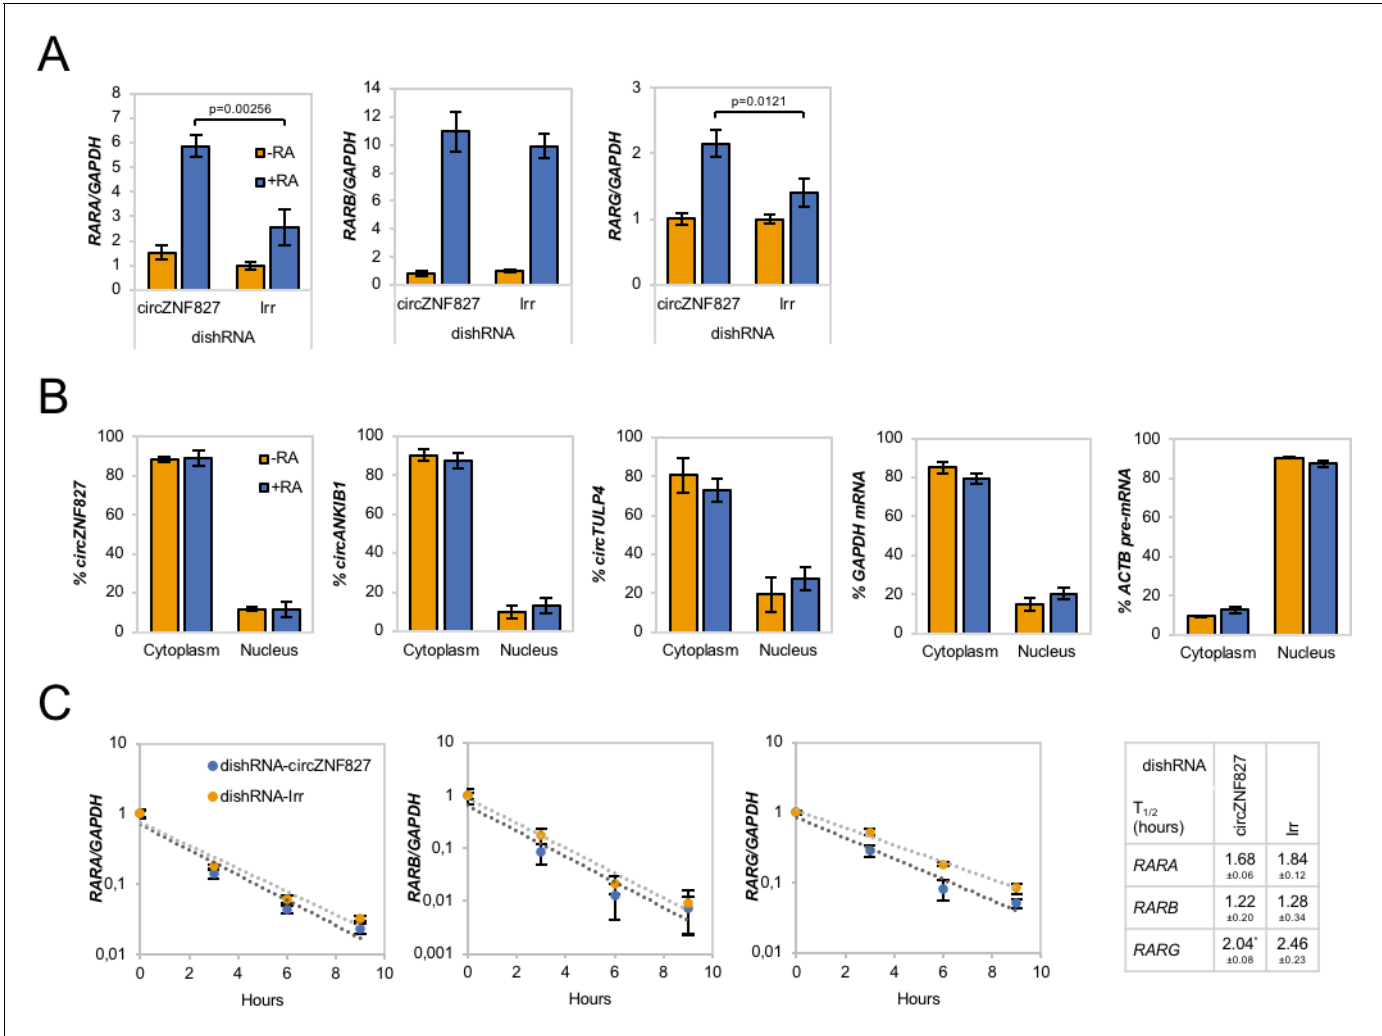

**Figure 3.** Increased *RAR* expression upon *circZNF827* knockdown. **(A)** mRNA expression levels of the *RAR* receptors *RARA*, *RARB*, and *RARG* in L-AN-5 cells upon *circZNF827* knockdown evaluated by RT-qPCR. **(B)** Subcellular localization of the circRNAs *circZNF827*, *circANKIB1*, and *circTULP4* examined by RT-qPCR after fractionation of differentiated L-AN-5 cells into cytoplasmic and nuclear fractions. *GAPDH* mRNA and *ACTB* pre-mRNA levels were used for validation of the purity of the cytoplasmic and nuclear fractions. **(C)** BrU pulse-chase mRNA decay assay evaluating decay rates of *RAR* mRNAs upon *circZNF827* knockdown. The *RAR* mRNA expression levels were evaluated by RT-qPCR. In right panel, half-lives of the *RARs* obtained in the experiment are indicated. +RA: differentiated L-AN-5 cells. -RA: undifferentiated L-AN-5 cells. Irr: Irrelevant dishRNA. In all panels data are depicted as mean ± SD (three biological replicates). p-Values were determined by a two-tailed Student's t test.

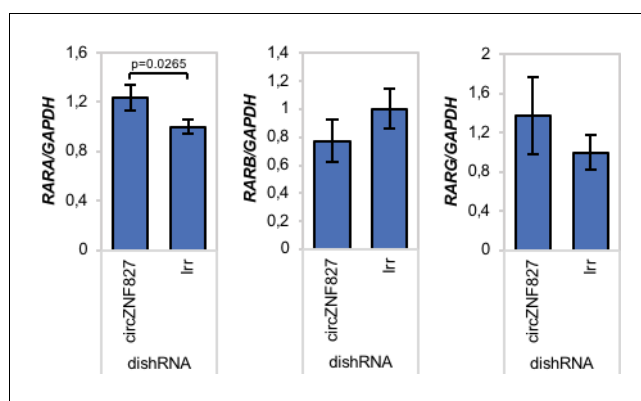

**Figure 3—figure supplement 1.** RAR mRNA transcription rates estimated after BrU-labeling of newly synthesized RNA in differentiated L-AN-5 cells by RT-qPCR. Irr: Irrelevant dishRNA. Data are depicted as mean  $\pm$  SD (three biological replicates). p-Values were determined by a two-tailed Student's t test.

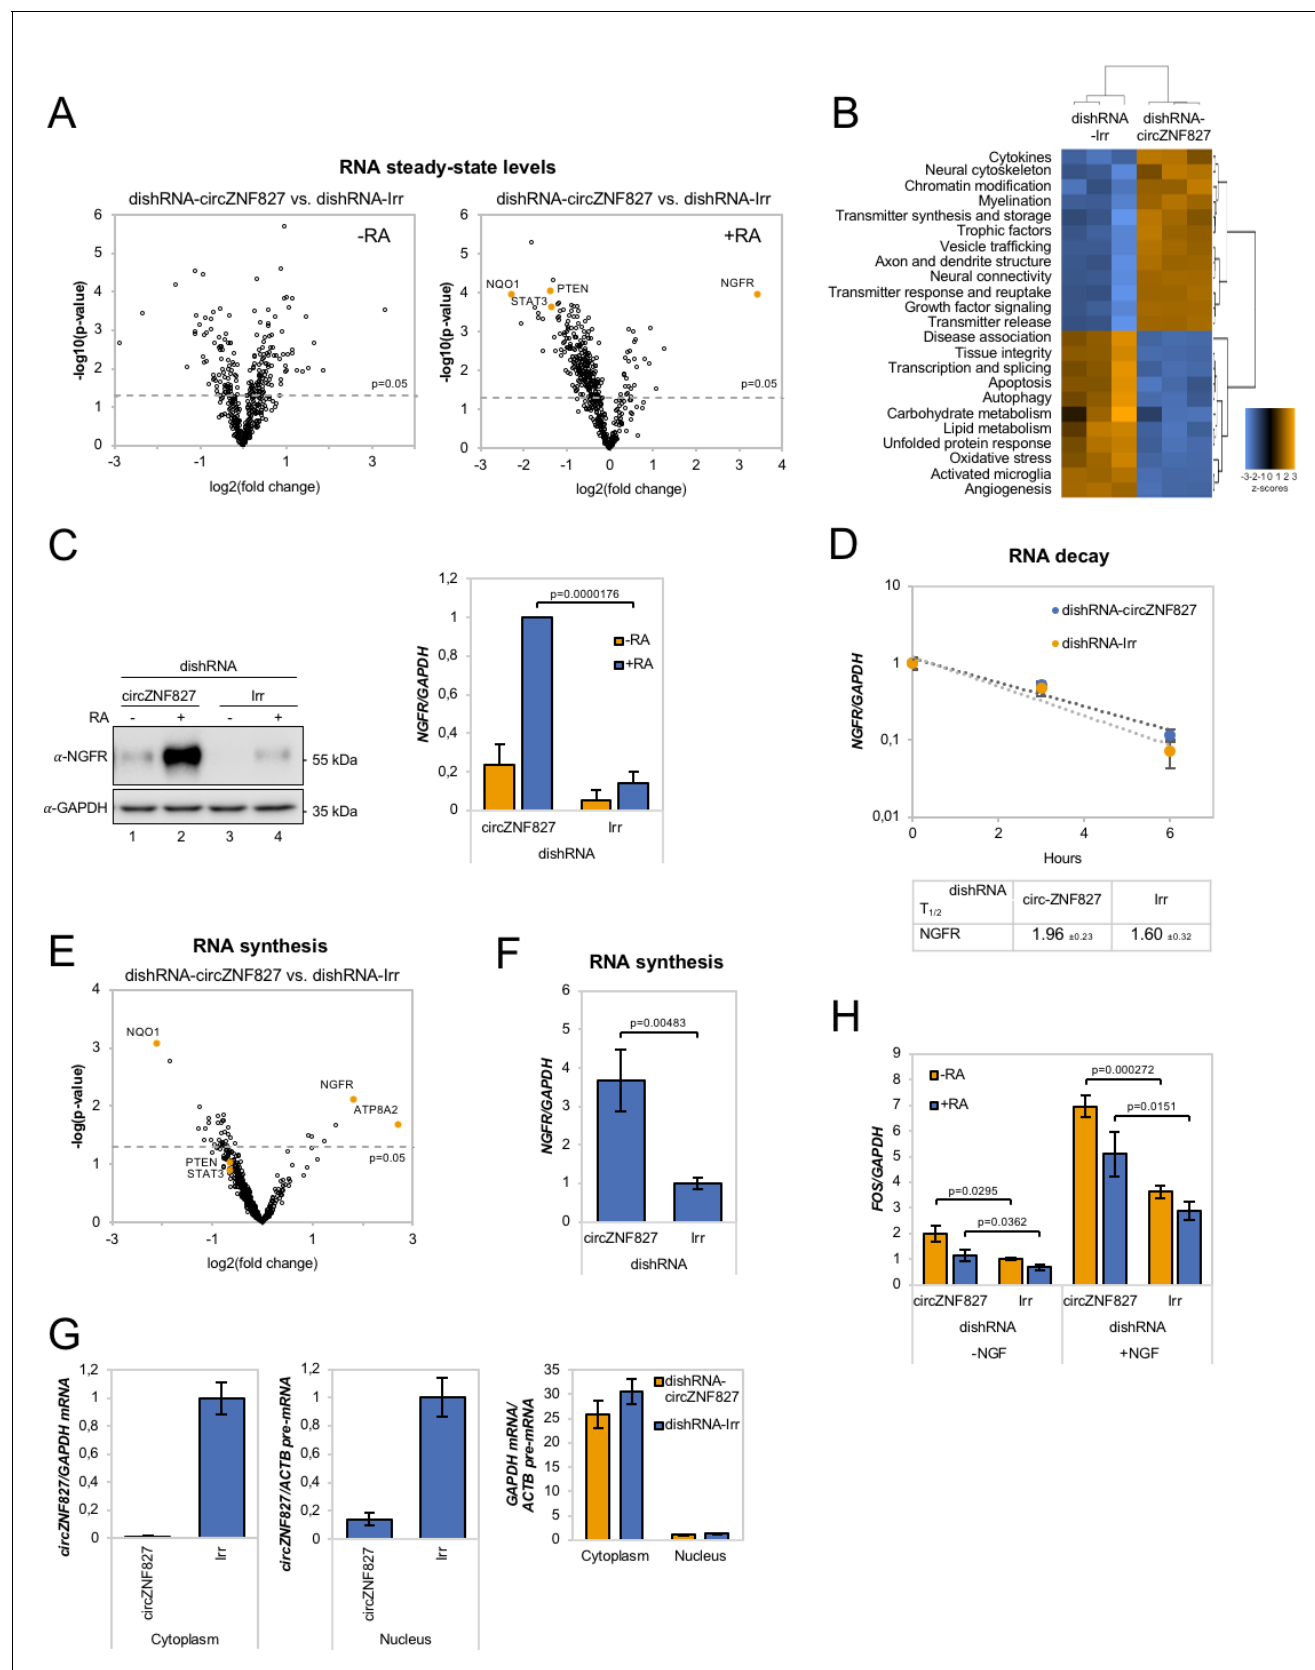

**Figure 4.** *circZNF827* regulates NGFR expression. (A) Volcano plot based on a Nanostring analysis of the expression of ~800 neuropathology-related genes upon *circZNF827* knockdown in L-AN-5 cells vs control without RA treatment (left panel) or with RA treatment (right panel). (B) GO-term analysis

Figure 4 continued on next page

## Figure 4 continued

based on genes found differentially expressed by the Nanostring analysis upon *circZNF827* knockdown in differentiated L-AN-5 cells. (C) Western blotting (left panel) of NGFR upon *circZNF827* knockdown in L-AN-5 cells. GAPDH was used as loading control. The result of quantification of band intensities from the western blots is shown in the right panel. One representative western blot and the quantification of three is shown. (D) BrU pulse-chase mRNA decay assay evaluating decay rates of *NGFR* mRNAs upon *circZNF827* knockdown. In the bottom panel, the half-lives of NGFR obtained in the experiment are indicated. (E) Volcano plot showing mRNAs with changed synthesis rates estimated after BrU-labeling of newly synthesized RNA by Nanostring analysis using the neuropathology panel. (F) RT-qPCR-based validation of the Nanostring analysis shown in (E). (G) Evaluation of *circZNF827* knockdown in L-AN-5 cells after subcellular fractionation into nuclear and cytoplasmic RNA fractions by RT-qPCR. *GAPDH* mRNA and *ACTB* pre-mRNA levels was used for validation of the purity of the cytoplasmic and nuclear fractions. (H) *FOS* mRNA levels evaluated by RT-qPCR after *circZNF827* knockdown and NGF stimulation of L-AN-5 cells. +RA: differentiated L-AN-5 cells. -RA: undifferentiated L-AN-5 cells. Irr: Irrelevant dishRNA. Data are depicted as mean  $\pm$  SD (three biological replicates). (D–F) One representative western blot is shown. p-Values were determined by a two-tailed Student's t test.

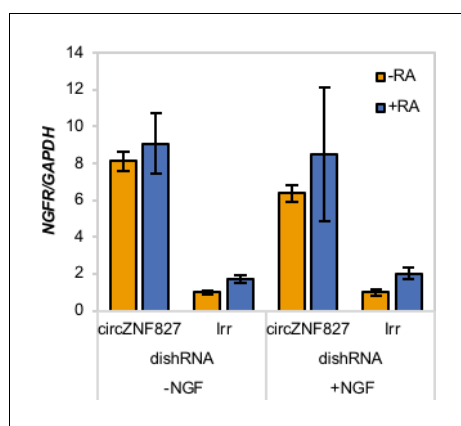

**Figure 4—figure supplement 1.** *NGFR* mRNA expression upon *circZNF827* knockdown in NGF-stimulated L-AN-5 cells. -RA: undifferentiated L-AN-5 cells. Irr: Irrelevant dishRNA. RT-qPCR data are depicted as mean  $\pm$  SD (three biological replicates).

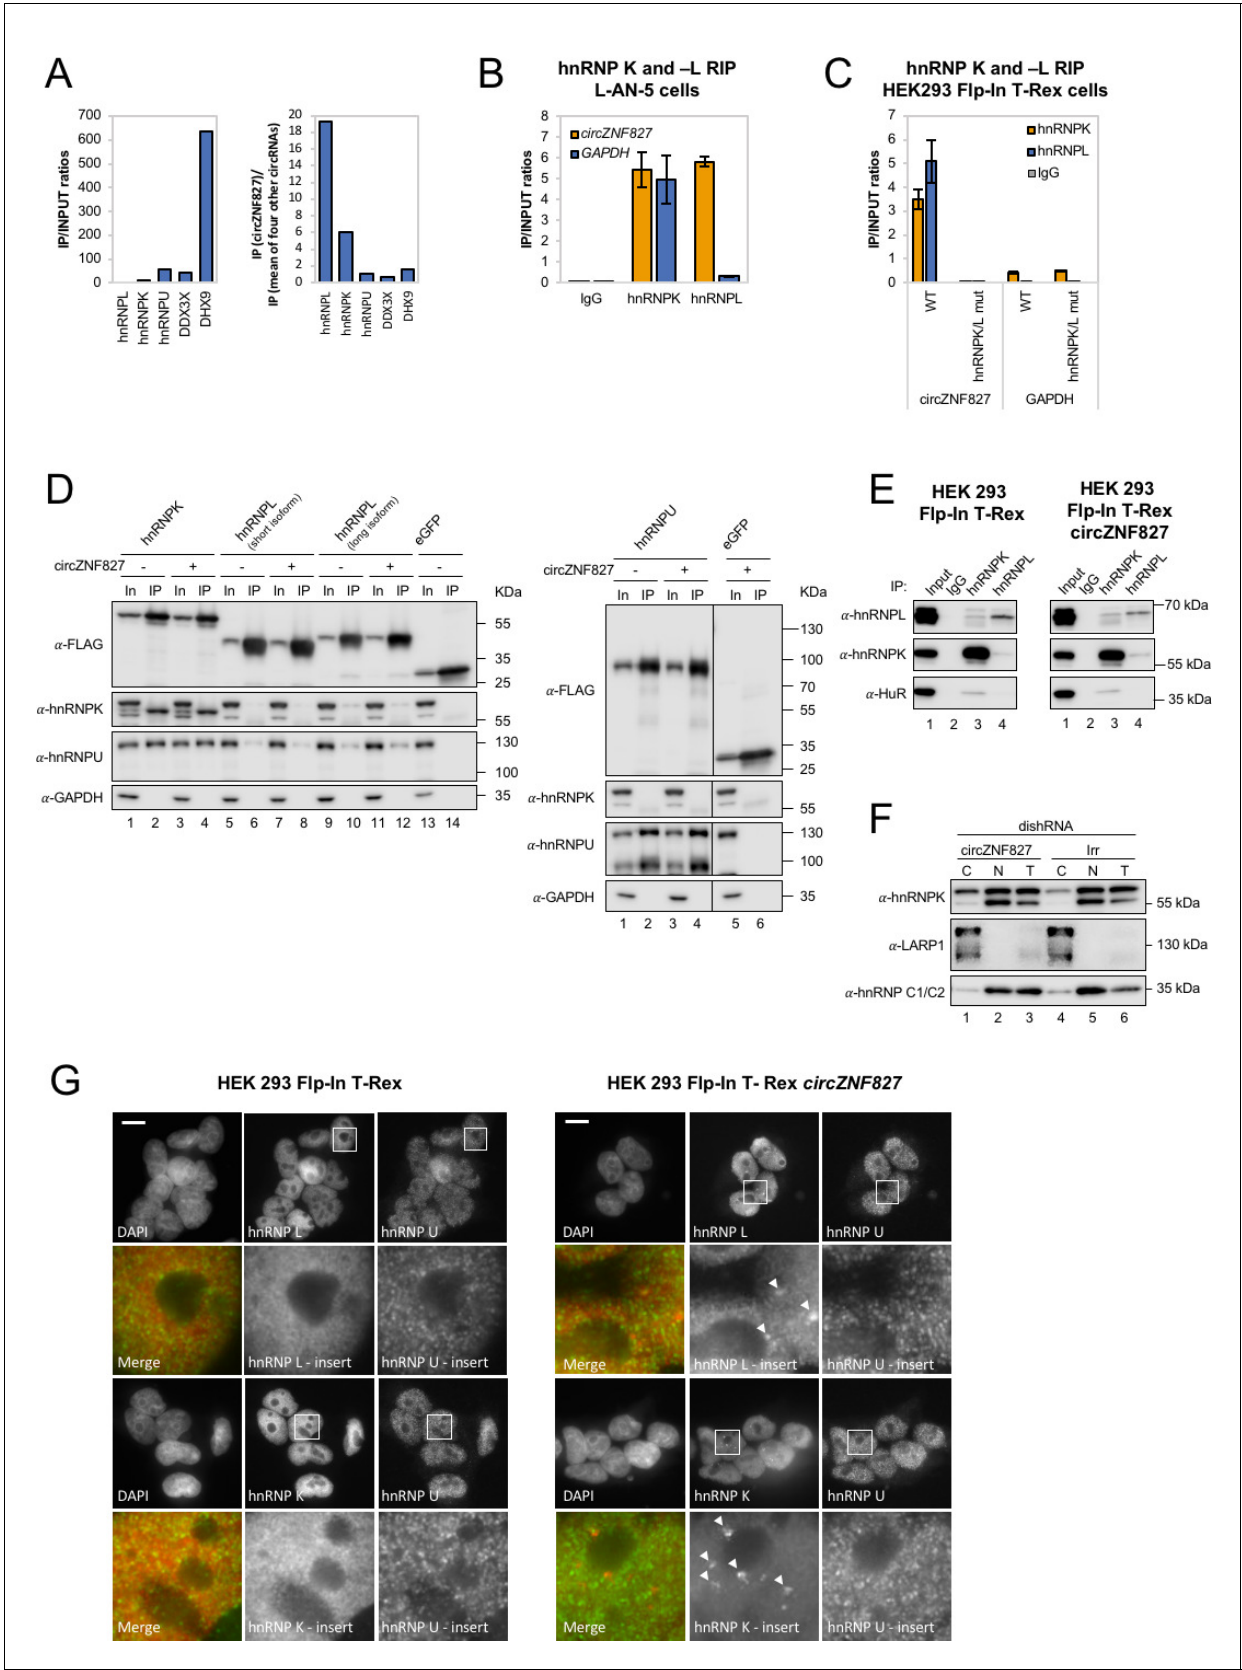

**Figure 5.** *circZNF827* interacts with and regulates the subcellular localization of hnRNP K and -L. (A) circRNA-RBP complex isolation from differentiated L-AN-5 cells followed by protein identification using mass spectrometry (LC-MS/MS). IP/Input ratios (based on IBAQ values) for selected RBPs (hnRNP L, Figure 5 continued on next page



## Figure 5 continued

hnRNP L, hnRNP U, DDX3X and DHX9) pulled down by *circZNF827* are shown in left panel. In the right panel IP ratios of selected RBPs pulled down by *circZNF827* relative to IP ratios for four other circRNAs (*circTULP4*, *circHDGFRP3*, *circSLC8A1*, and *circZNF609*) are shown. (B) RIP experiment evaluating interaction between *circZNF827* and hnRNP K and -L in differentiated L-AN-5 cells. (C) RIP experiment evaluating interaction between both wildtype *circZNF827* (WT) and *circZNF827* with a deletion of predicted hnRNPK/L binding sites (hnRNPK/L mut) and hnRNP K and -L in the HEK293 Flp-In T-rex *circZNF827* cell lines. Co-immunoprecipitation (co-IP) of both exogenously FLAG-tagged (D) and endogenously (E) expressed hnRNP K, -L and -U in HEK293 Flp-In T-rex cells with and without *circZNF827* expression. GAPDH and HuR were used as loading controls in (D) and (E) respectively. (F) Western blot evaluating subcellular localization of hnRNP K in differentiated L-AN-5 cells upon *circZNF827* knockdown. LARP1 and hnRNP C1/C2 were used for validation of the purity of the cytoplasmic and nuclear fractions. (G) Co-immunofluorescence (co-IF) of hnRNP K, -L and -U in HEK293 Flp-In T-rex cells upon *circZNF827* overexpression. Arrows are pointing to hnRNP K- and hnRNP L-containing nuclear foci. Nuclei were visualized by DAPI staining. The scale bar indicates 10  $\mu$ m. Irr: Irrelevant dishRNA. C: cytoplasmic fraction, N: nuclear fraction, T: total cell lysate. Data are depicted as mean  $\pm$  SD (three biological replicates). (B), (E), and (H) One representative western blot is shown. Data shown in (A) and (C) are based on two and one replicates, respectively.

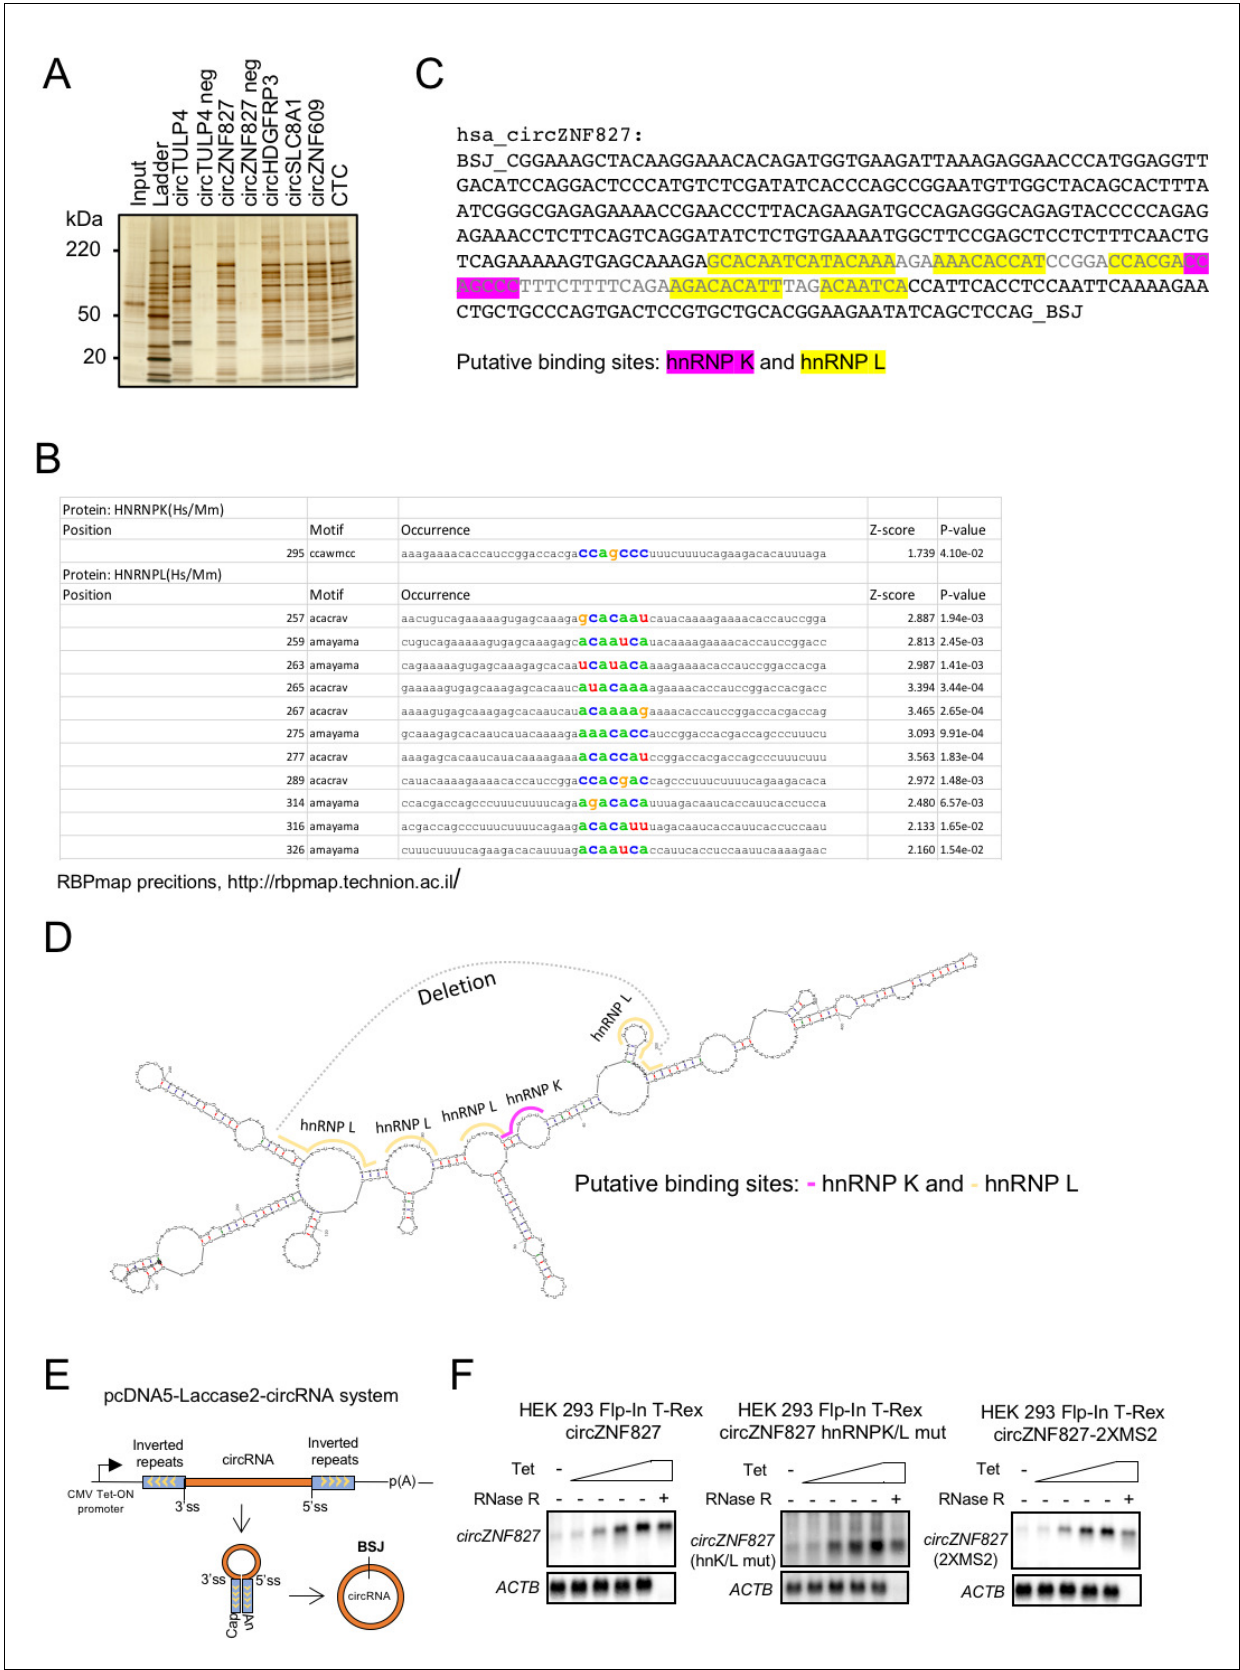

**Figure 5—figure supplement 1.** Mapping hnRNP K and hnRNP L binding sites within circZNF827. (A) Silver stain of circRNA-pull down samples analyzed by LC-MS/MS. The negative controls included are circRNA templates transcribed without biotin-CTP (*circTULP4* neg and *circZNF827* neg). The Figure 5—figure supplement 1 continued on next page

## Figure 5—figure supplement 1 continued

CTC is a lincRNA with a known binding profile included as reference. (B–C) Prediction of hnRNP K and -L binding sites in the most 3' part of the *circZNF827*-encoding sequence by RBPmap. (D) MFold prediction of the secondary structure of *circZNF827* shown with the predicted hnRNP K- and -L-binding sites. Dark gray letters in (C) and dark gray dotted line in (D) indicates the deleted sequence in the *circZNF827* hnRNP K/L mutant. (E) Schematic drawing of the stable HEK293 Flp-In T-rex cell-line for Laccase2 vector-based expression of *circZNF827* from a tetracycline-inducible promoter (CMV tet-on). (F) Northern blot showing induction profile for *circZNF827*, *circZNF27* hnRNP K/L mut, and *circZNF827* 2xMS2 expression in the stable HEK293 Flp-In T-rex *circZNF827* cell lines. Notably, all *circZNF827* variants are shown to be RNase R resistant, whereas the linear loading control (*ACTB* mRNA) is RNase R sensitive. SS: splice site, BSJ: back splice junction.

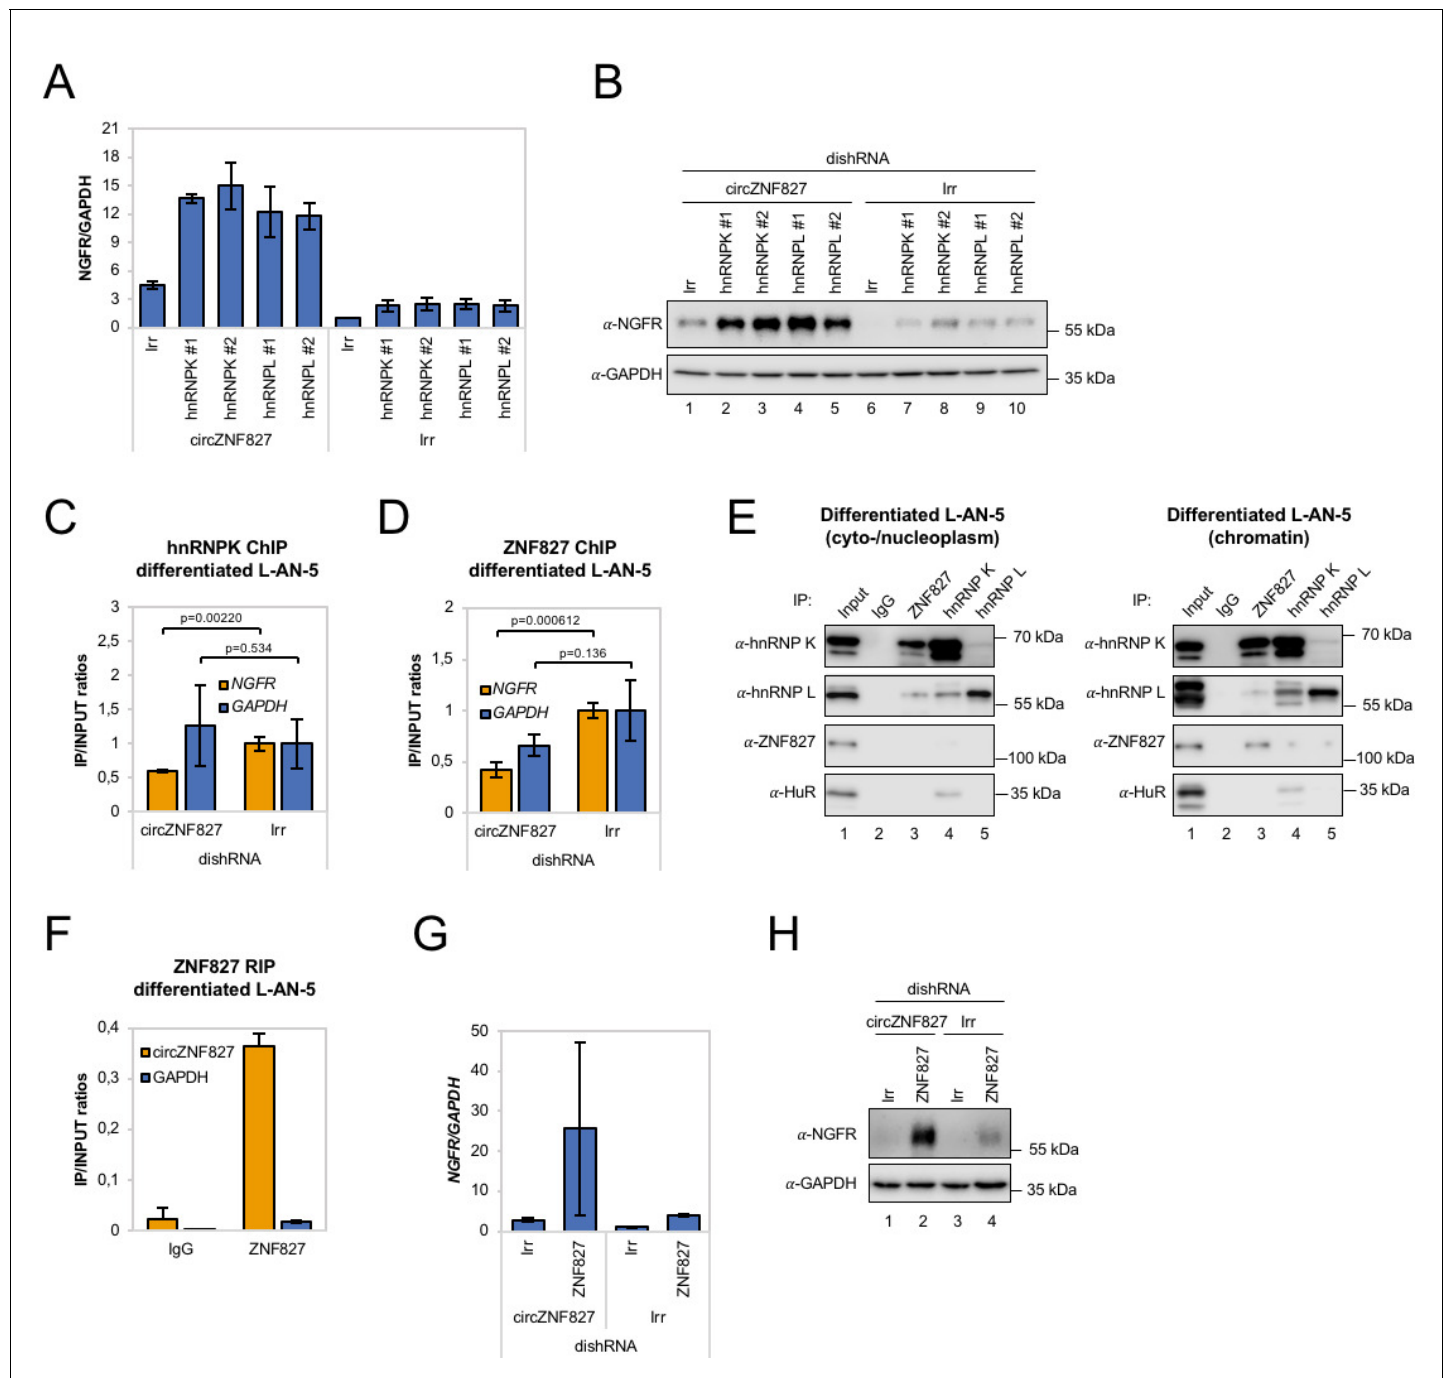

**Figure 6.** *circZNF827* regulates hnRNP K and ZNF827 activity in L-AN-5 cells. RT-qPCR (A) and western blotting (B) evaluating NGFR expression upon co-knockdown of *circZNF827* and either hnRNP K or -L in differentiated L-AN-5 cells. GAPDH was used as loading control for the western blots. #1 and #2: two different dishRNAs targeting the same RBP. ChIP experiment assessing association between the *NGFR* gene and hnRNP K (C) and ZNF827 (D) upon *circZNF827* knockdown in differentiated L-AN-5 cells. (E) Co-immunoprecipitation (co-IP) of ZNF827, hnRNP K, -L and ZNF827 in cyto-/nucleoplasm (left) or chromatin fractions (right; sonicated pellets from cleared lysates) of differentiated L-AN-5 cells. IgG was used as IP control. HuR was used as negative control. (F) RNA-immunoprecipitation of *circZNF827* by ZNF827 in differentiated L-AN-5 cells. RT-qPCR (G) and western blotting (H) evaluating NGFR expression upon co-knockdown of *circZNF827* and ZNF827 in differentiated L-AN-5 cells. GAPDH was used as loading control for the western blots. Irr: Irrelevant dishRNA. Data are depicted as mean  $\pm$  SD (three biological replicates). p-Values were determined by a two-tailed Student's t test.

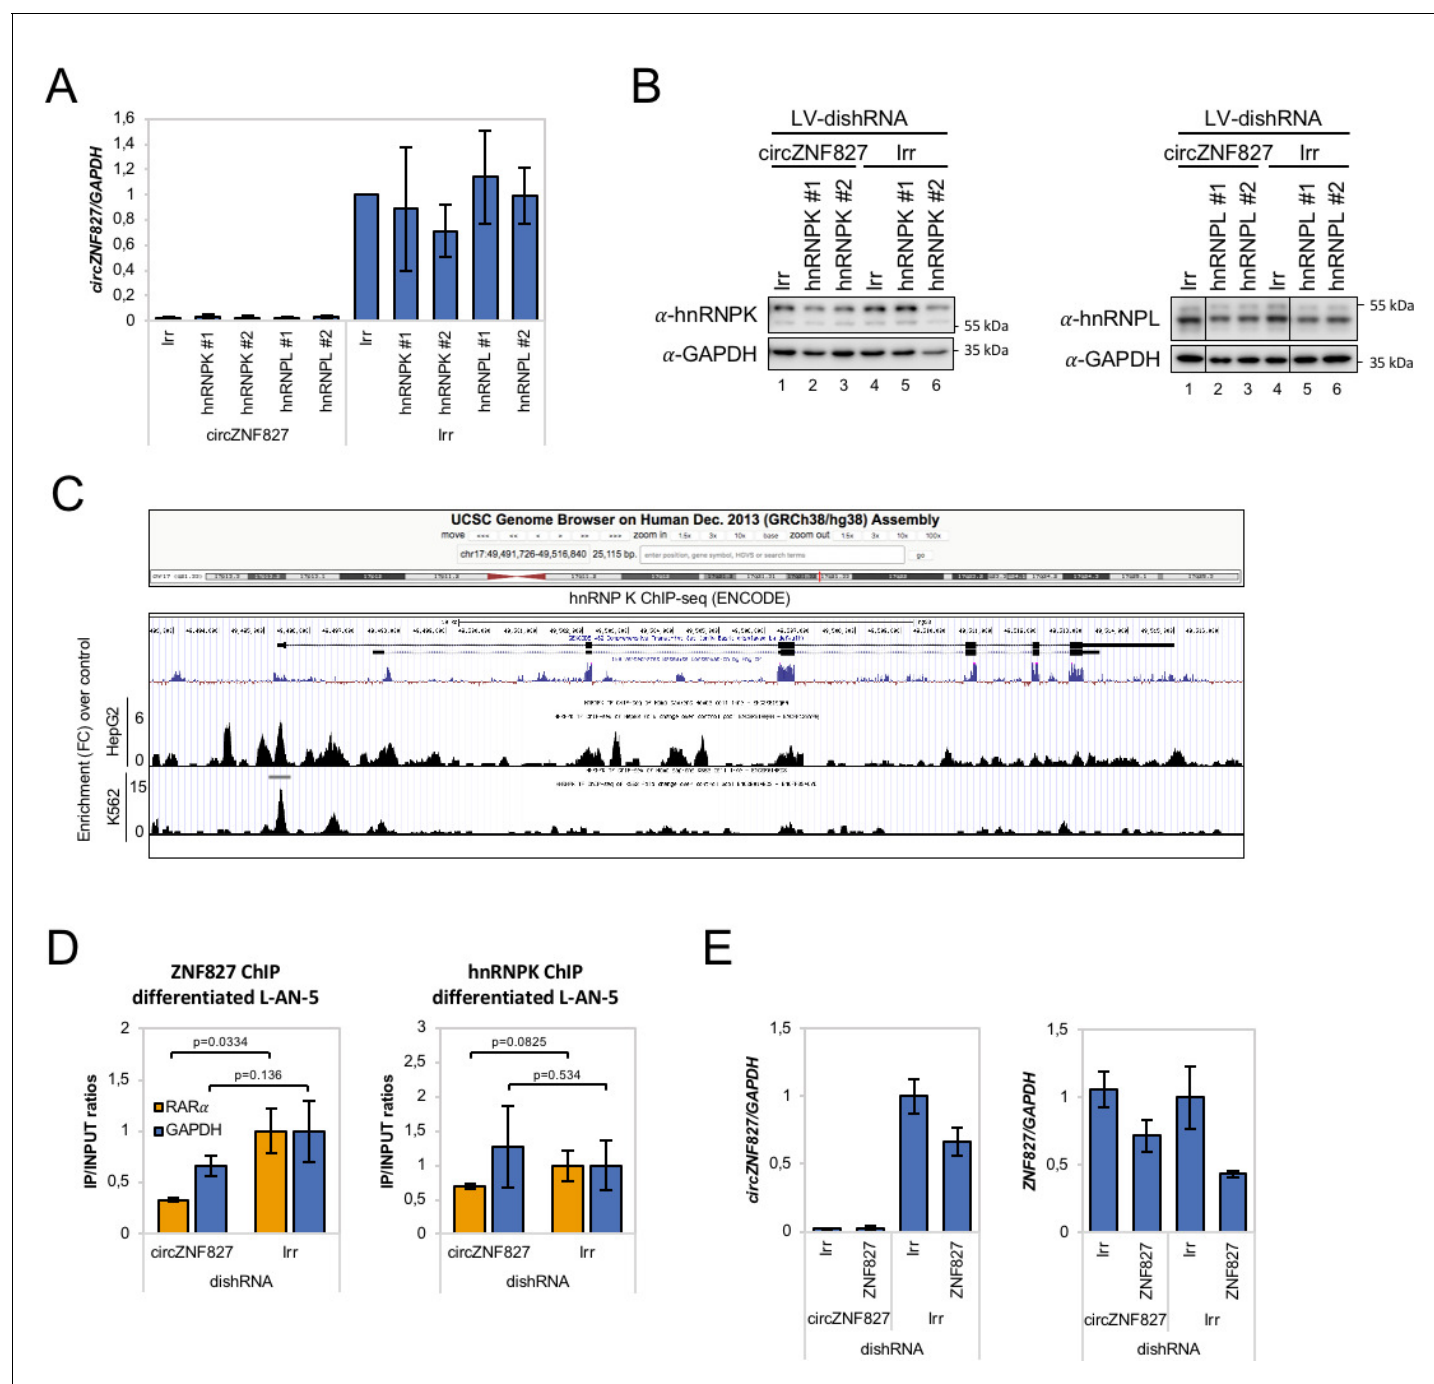

**Figure 6—figure supplement 1.** Knockdown and ChIP analyses of ZNF827 and hnRNP K/L associated with results shown in Figure 6A–B. (A) Quantification of *circZNF827* levels by RT-qPCR. Protein levels are evaluated by Western blotting in (B). GAPDH was used as loading control for the western blots. Representative Western blot is shown. #1 and #2: two different dishRNAs targeting the same BBP. (C) ChIP-seq data (ENCODE consortium) in K562 and HepG2 cells showing interaction between hnRNP K and the NGFR promoter. Y-axis displays enrichment (fold change (FC)) over control. (D) ChIP experiment assessing association between the *RARA* gene and hnRNP K (left) and ZNF827 (right) upon *circZNF827* knockdown in differentiated L-AN-5 cells. (E) Validation of *circZNF827* (left) and ZNF827 (right) knockdown associated with results shown in Figure 6G–H by RT-qPCR. *lrr*: Irrelevant dishRNA. Data are depicted as mean  $\pm$  SD (three biological replicates). p-Values were determined by a two-tailed Student's t test.

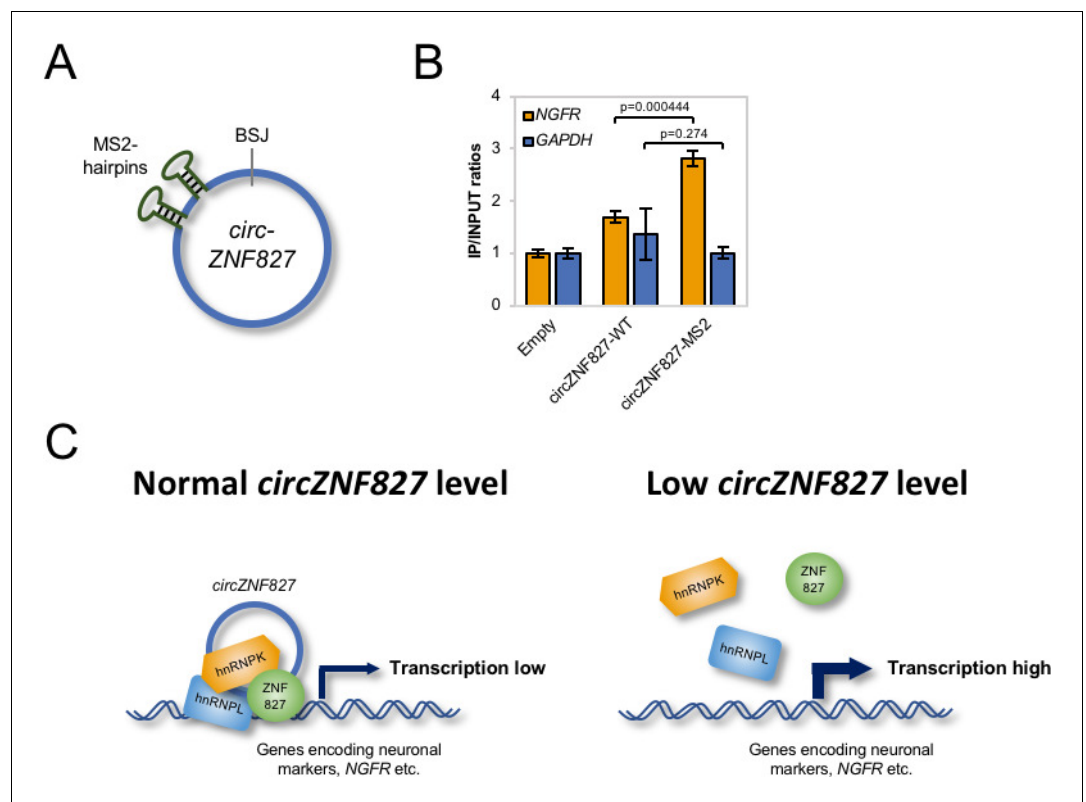

**Figure 7.** *circZNF827* is associated with the *NGFR* promoter region. (A) Schematic representation of *circZNF827* tagged with two MS2 hairpins. (B) ChIP experiment assessing association between the *NGFR* gene and *circZNF827* in HEK293 Flp-In T-rex cell lines expressing either wildtype *circZNF827* (*circZNF827*-WT) or MS2-tagged *circZNF827* (*circZNF827*-MS2). (C) Model illustrating how *circZNF827*, hnRNP K/L and ZNF827 regulates target gene expression. Target genes, e.g. *NGFR* is bound by a transcription repressive complex consisting of *circZNF827*, hnRNP K, hnRNP L and ZNF827. High levels of *circZNF827*, induced by neuronal differentiation keeps further differentiation markers in check (left panel), while knockdown of *circZNF827* (or hnRNP K/L or ZNF827) allows for higher transcription rates of target neuronal marker genes including *NGFR*. Data in (C) are depicted as mean  $\pm$  SD (three biological replicates).

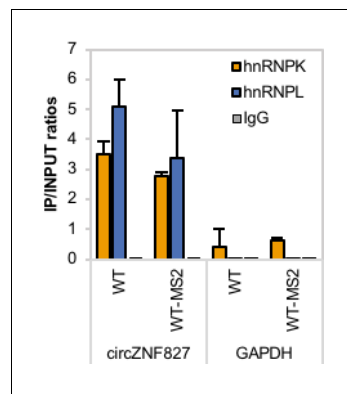

**Figure 7—figure supplement 1.** hnRNP K and - L interact with both wildtype and MS2-hairpin-modified circZNF827. RIP experiment evaluating interaction between both wildtype *circZNF827* (WT) and MS2-tagged *circZNF827* with a (WT-MS2) and hnRNP K and -L in the HEK293 Flp-In T-rex *circZNF827* cell lines. IgG was used as IP control. Data are depicted as mean  $\pm$  SD (three biological replicates).
